# Supplementary material for: HSP70-mediated mitochondrial dynamics and autophagy represent a novel vulnerability in pancreatic cancer
Source: PubMed Central journal article supplement (PMC11239841; doi:10.1038/s41418-024-01310-9), 2024-05-28

Figure 3

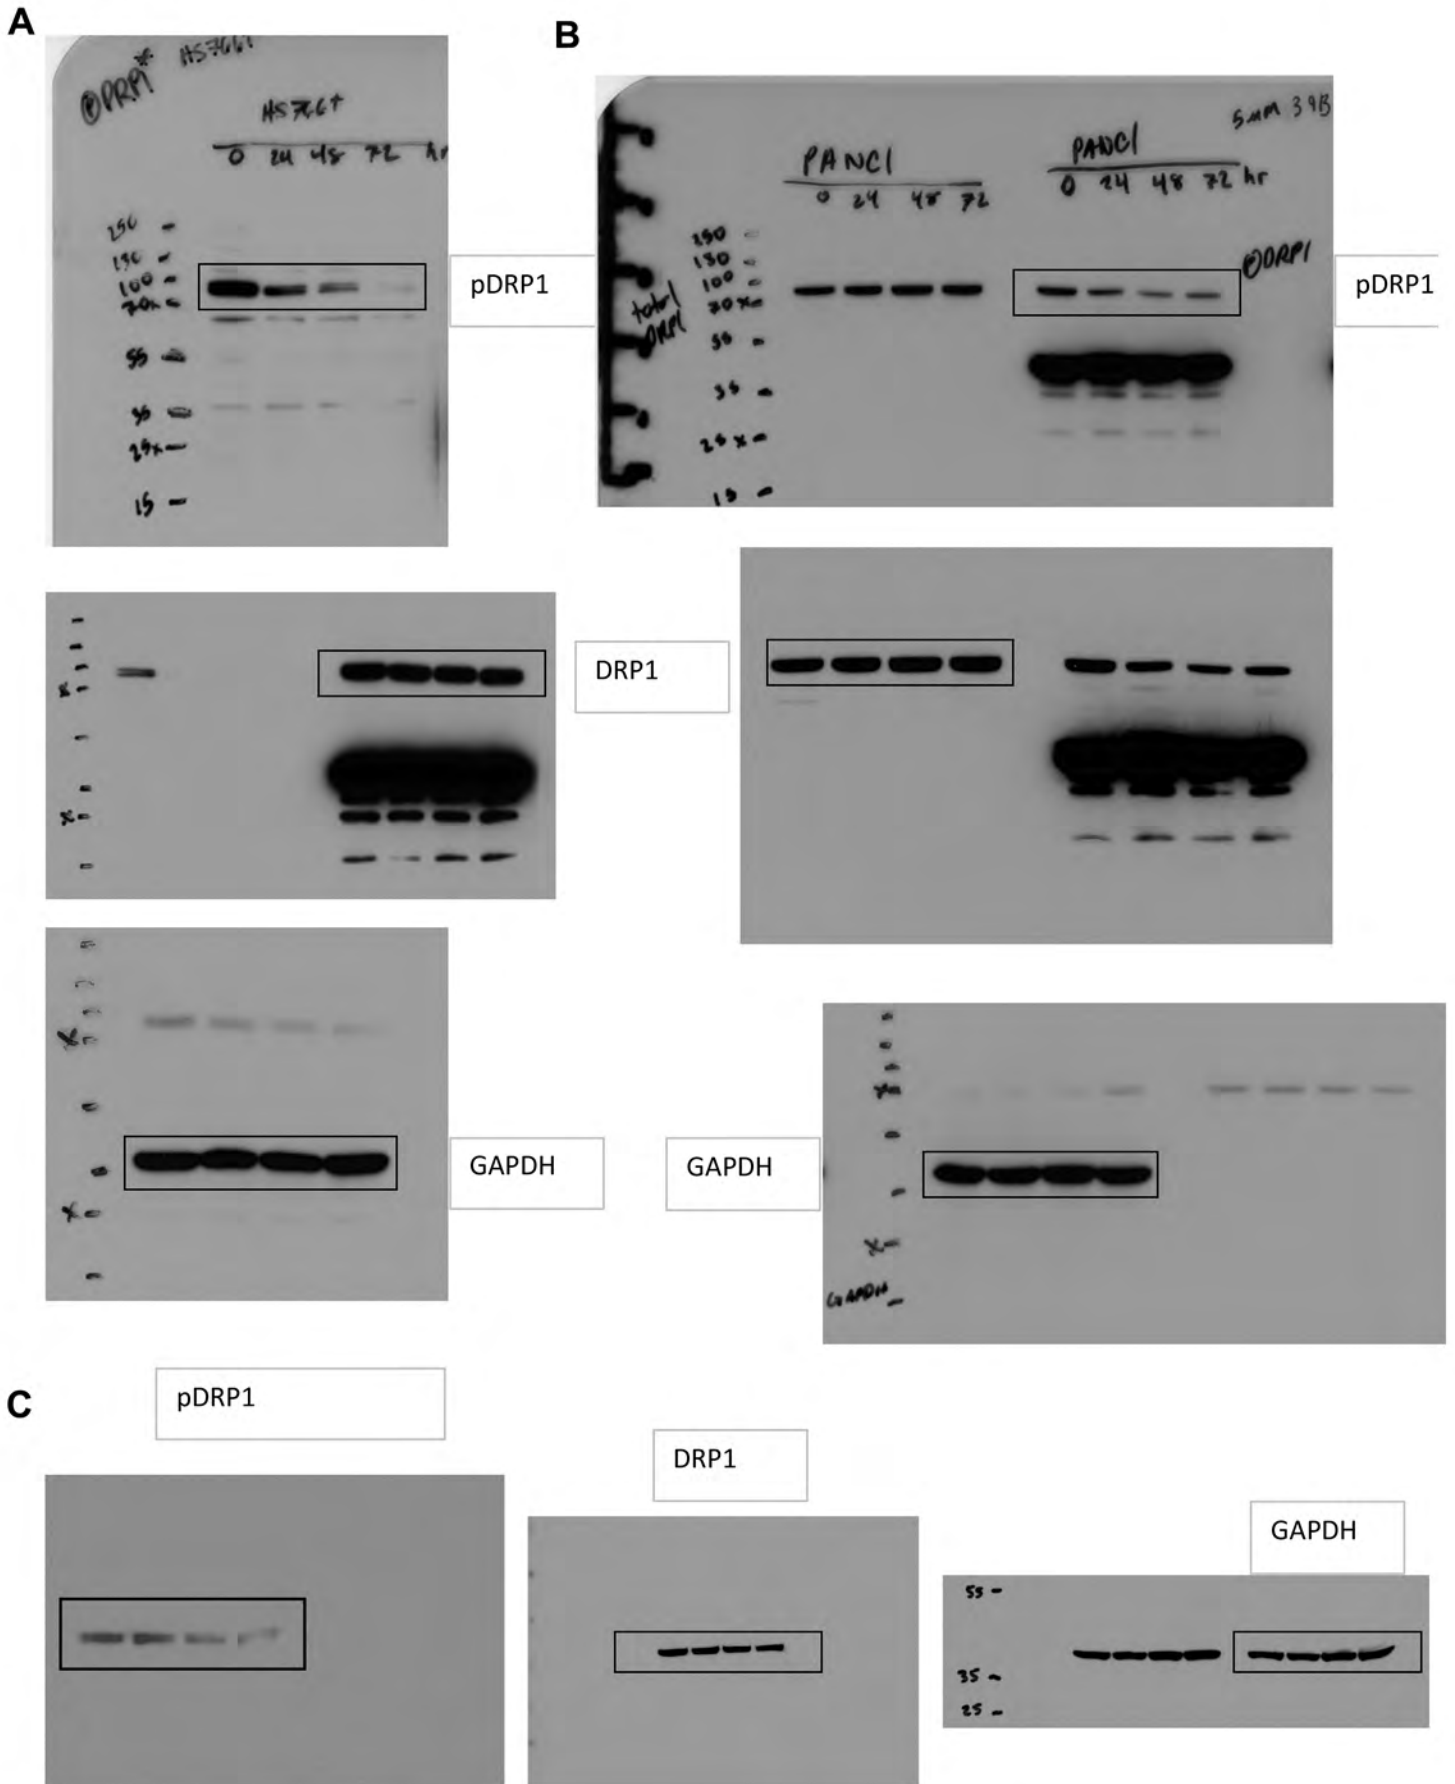

Figure 3

G

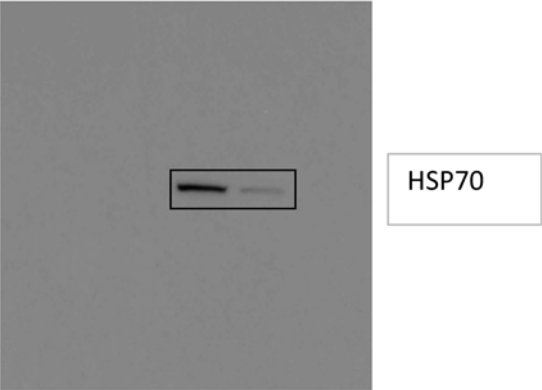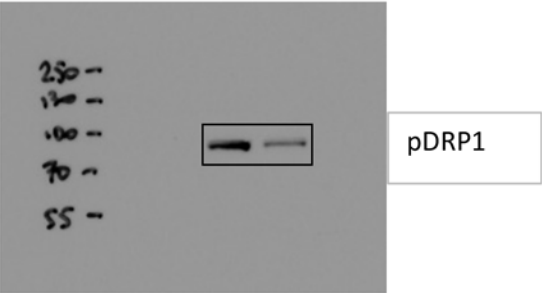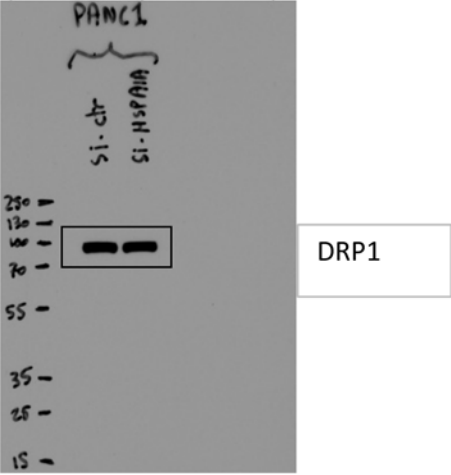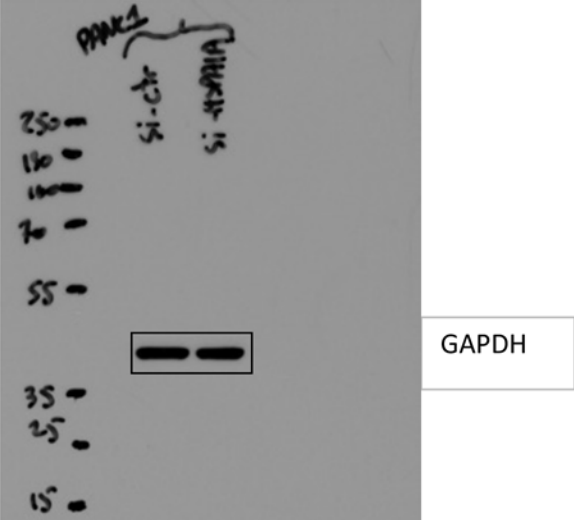

**Figure 3**  
**J (1-Hs766T)**

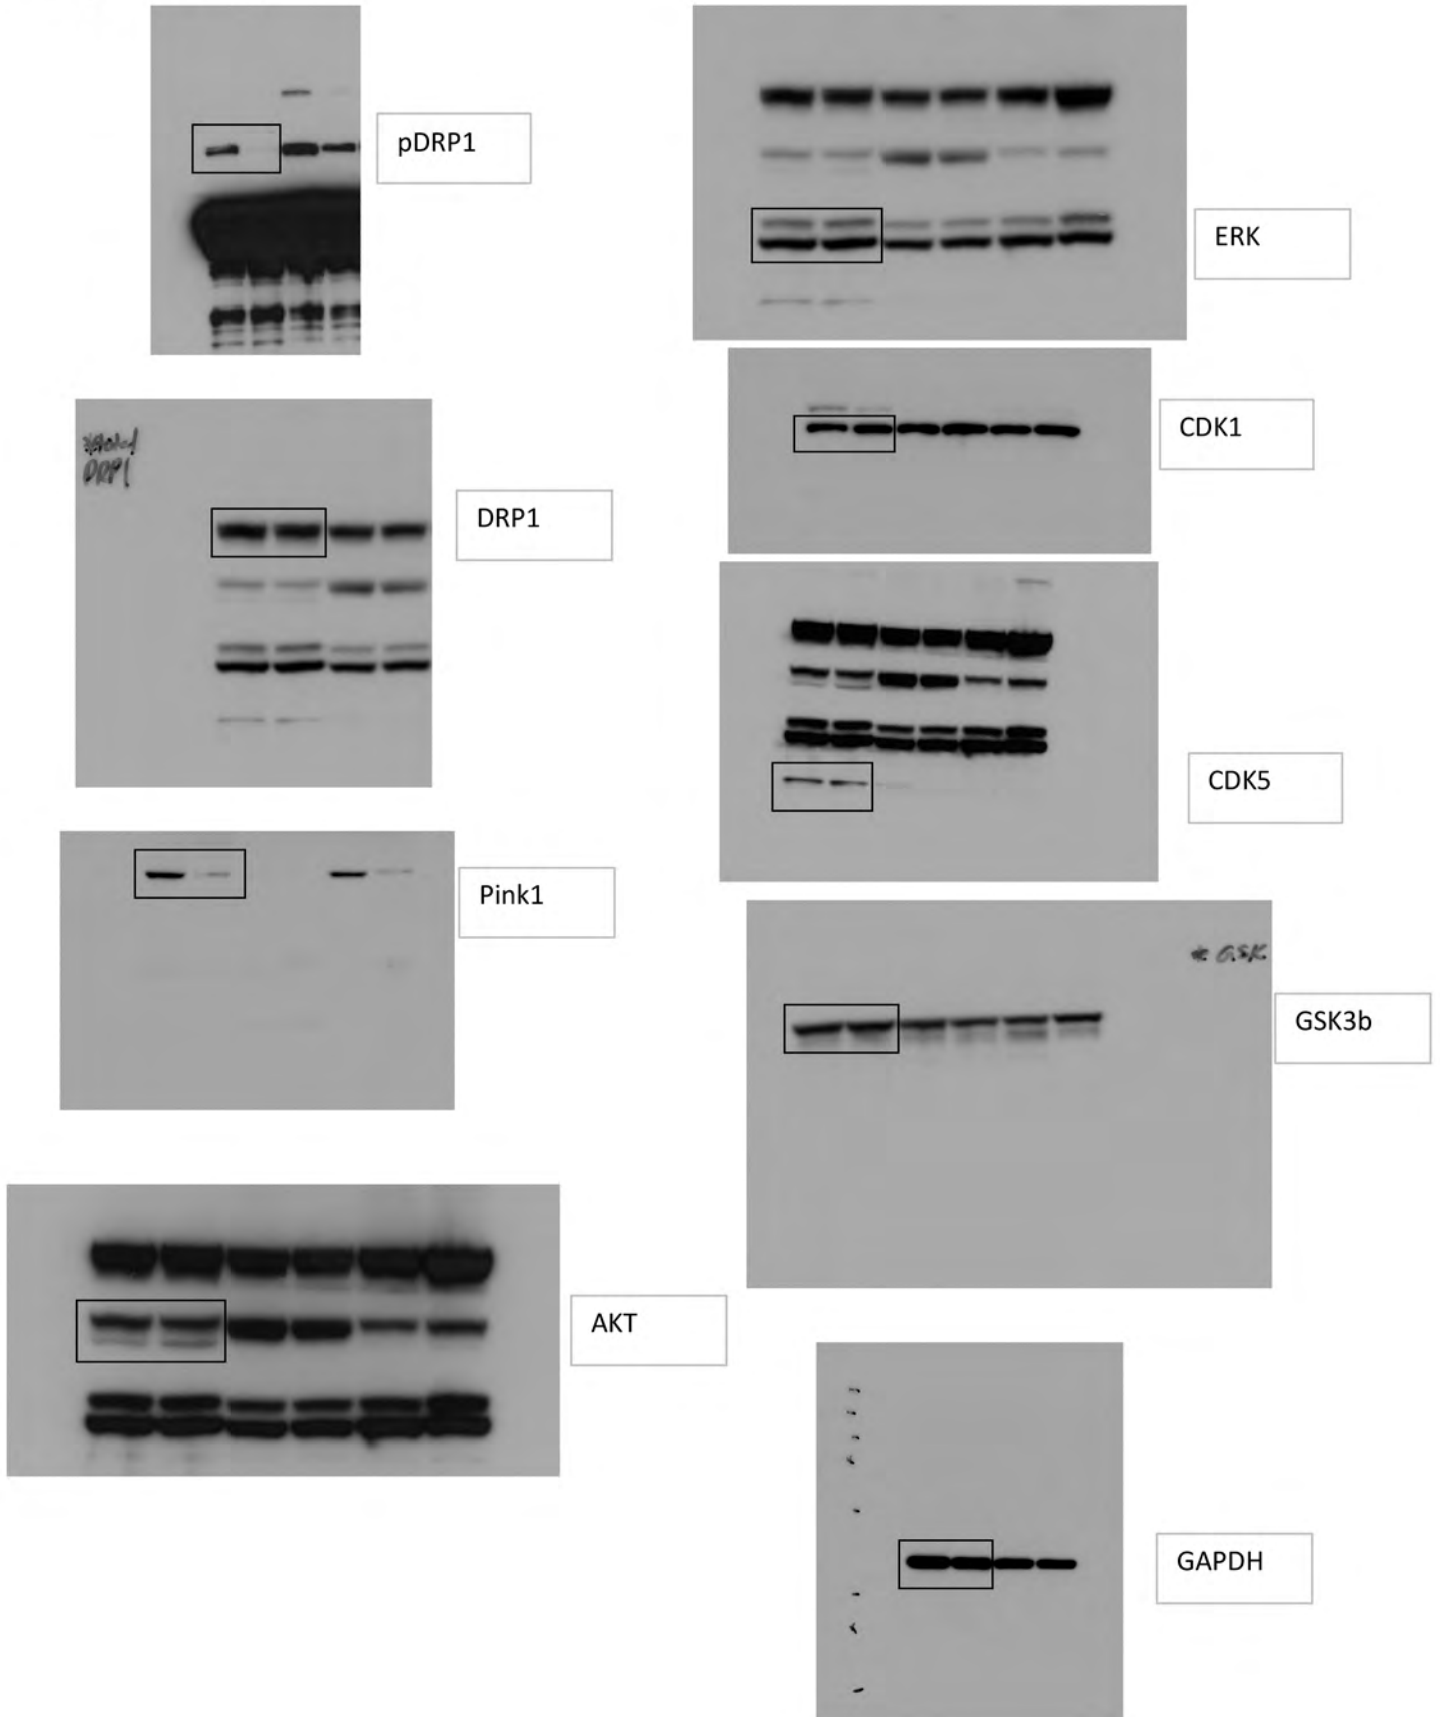

Figure 3

J (2)

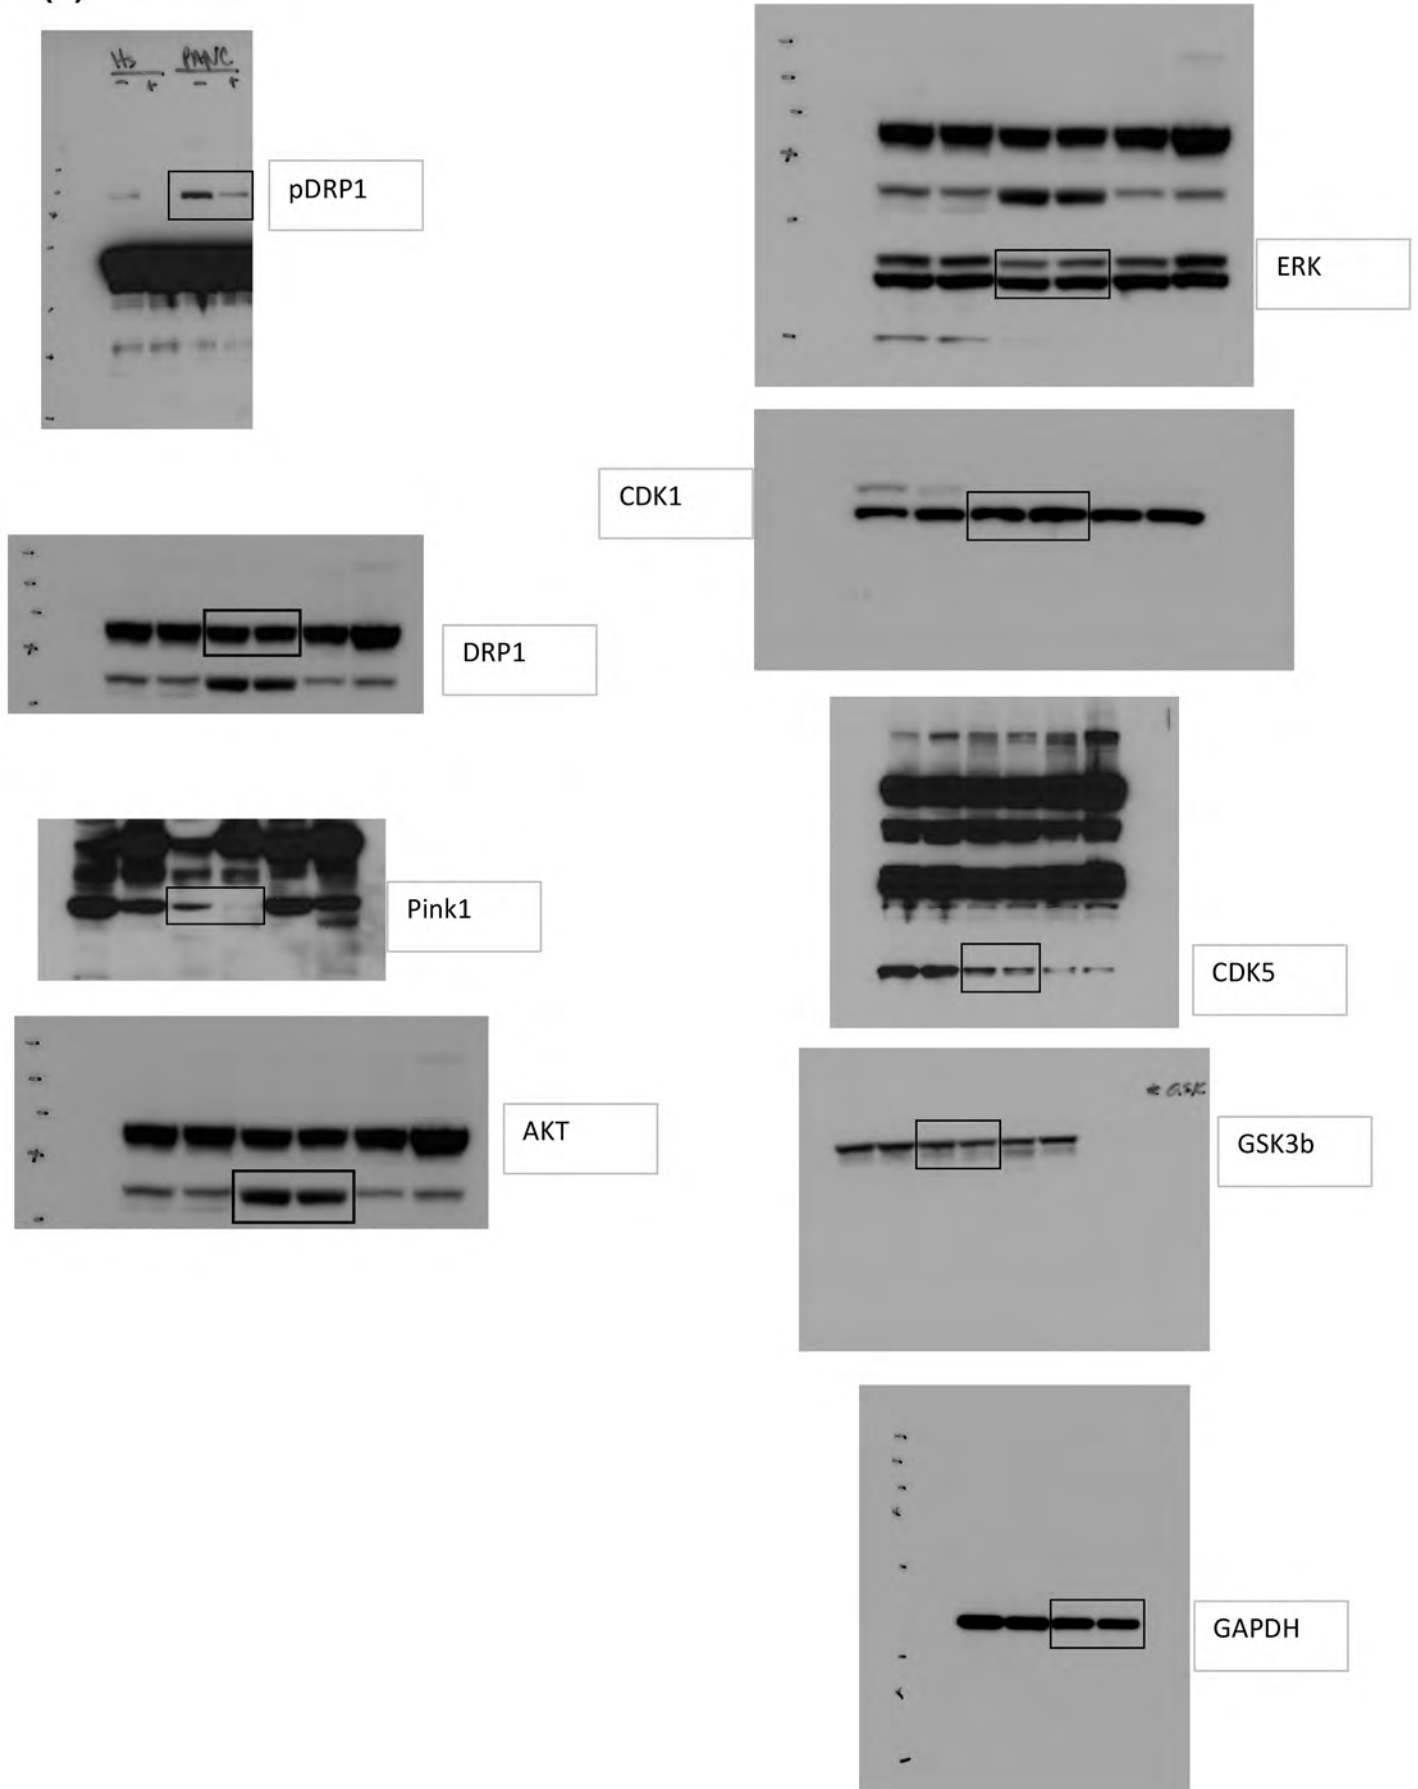

Figure 3

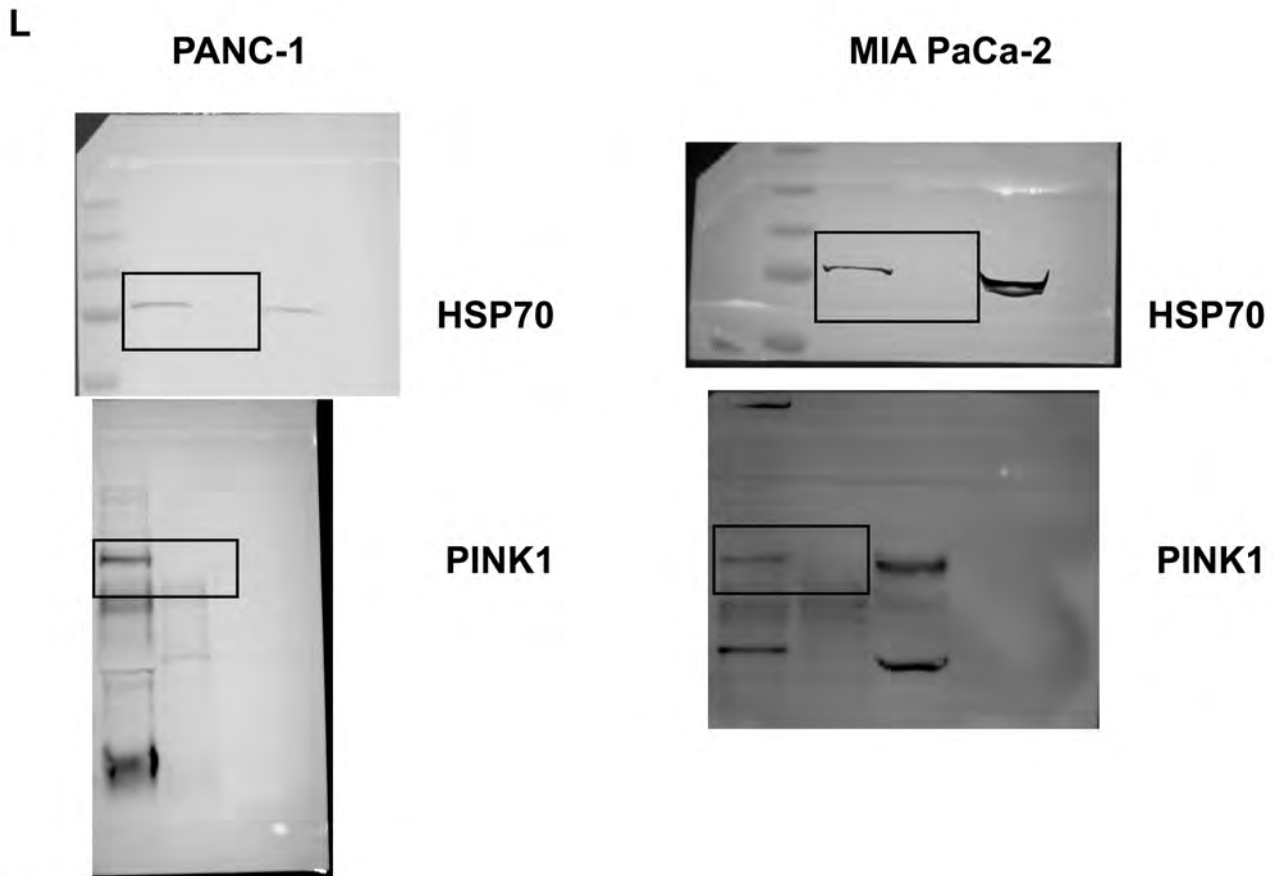

N

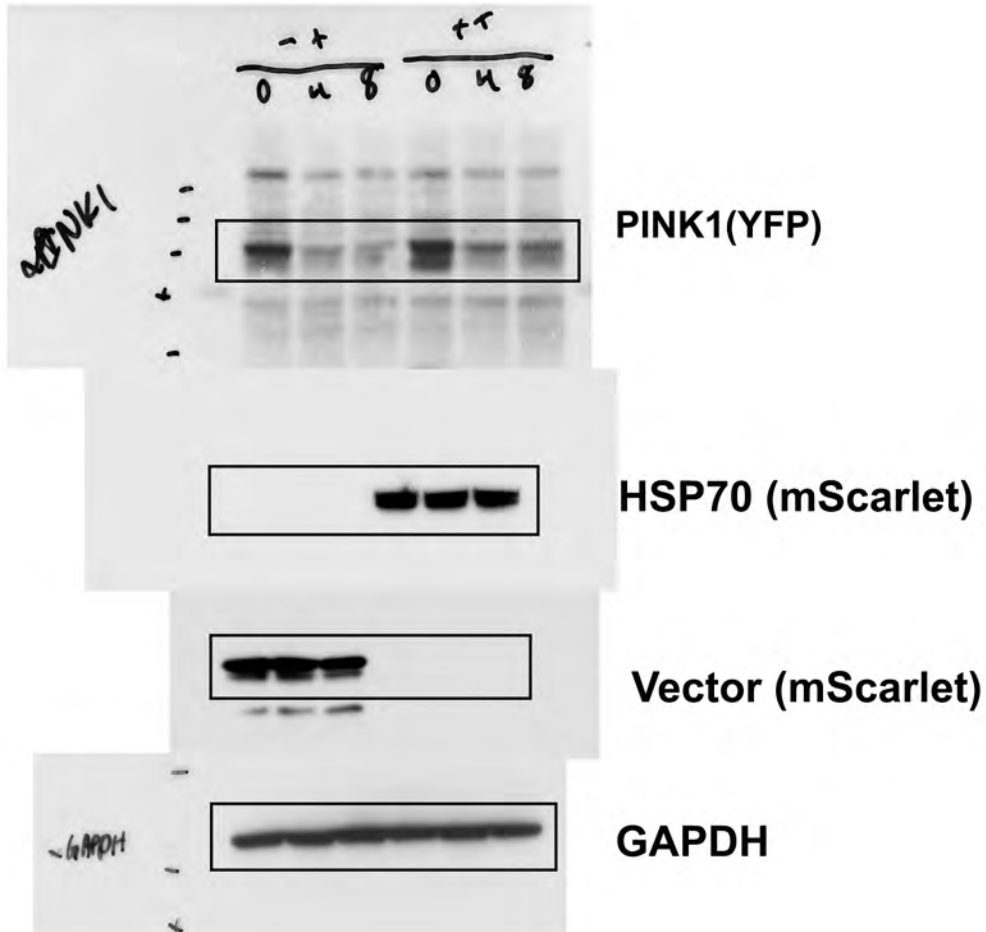

Figure 5

E

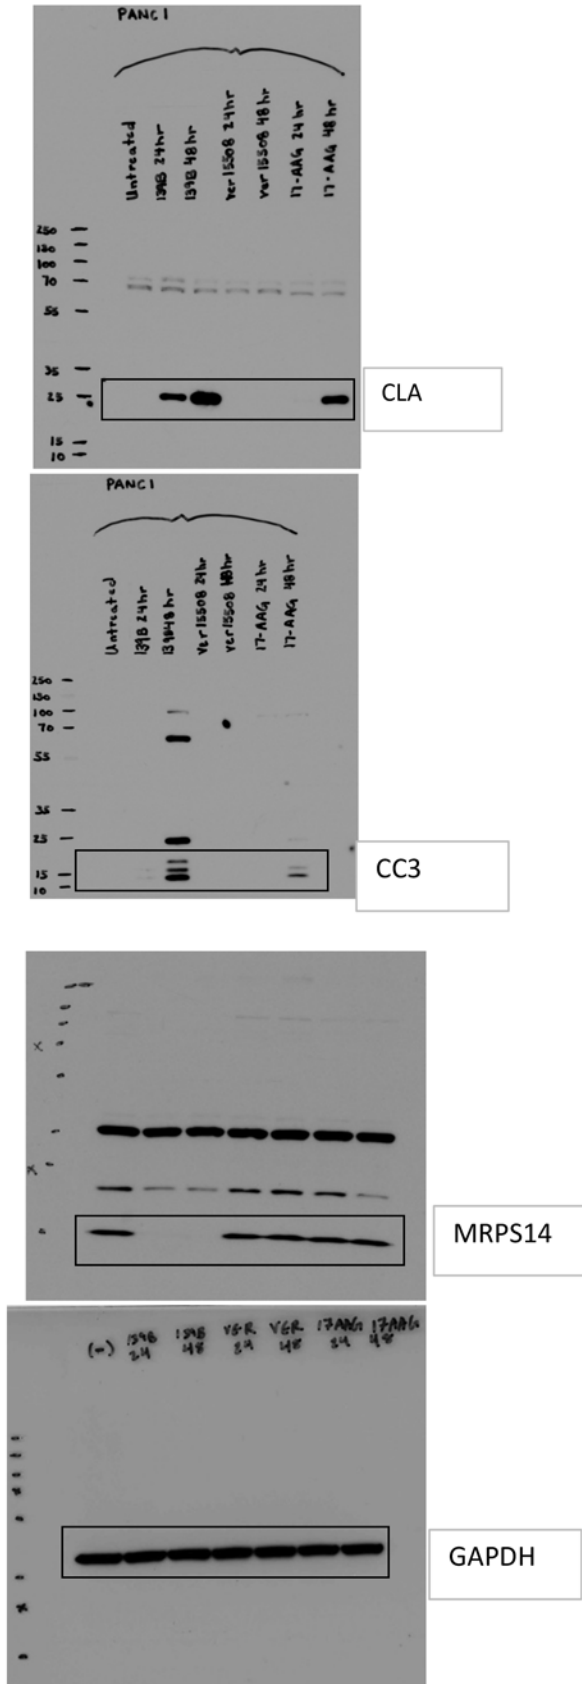

G (1)-PANC-1

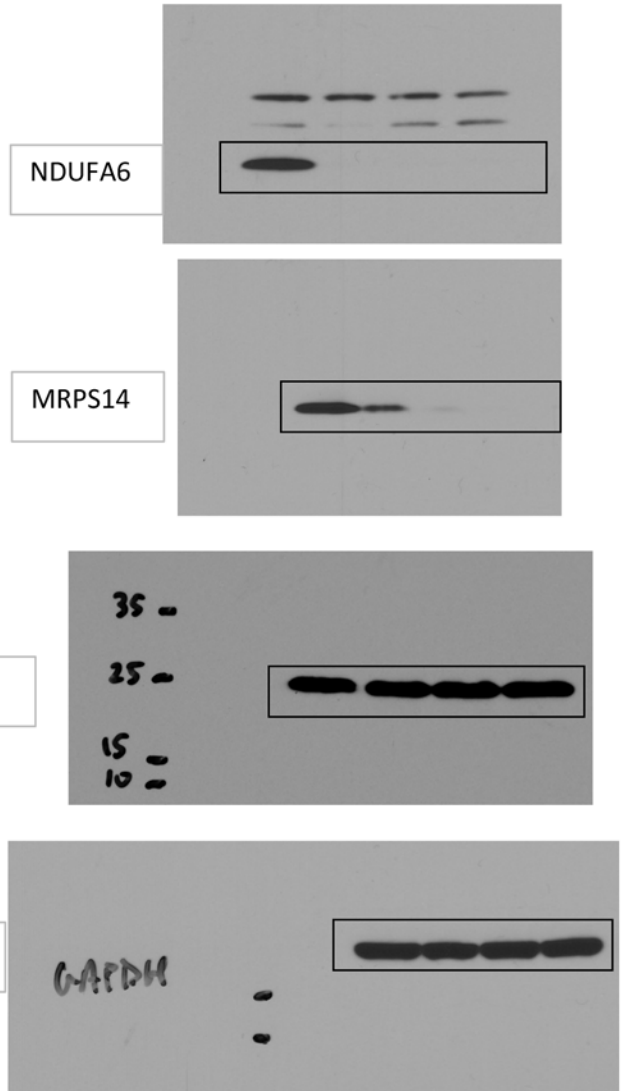

Figure 5

G (2)- MIA PaCa-2

G (3)- Hs766T

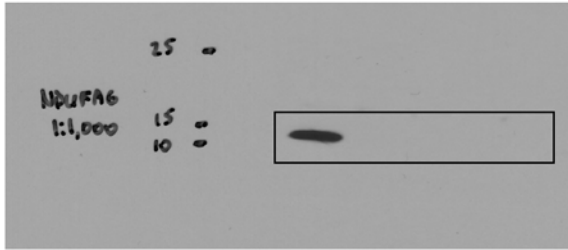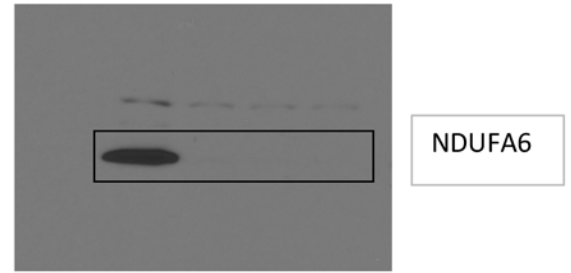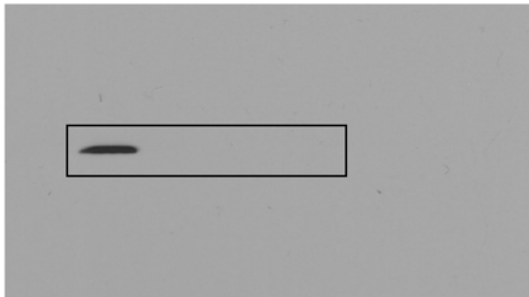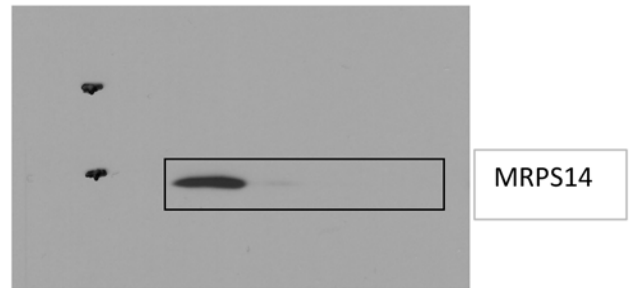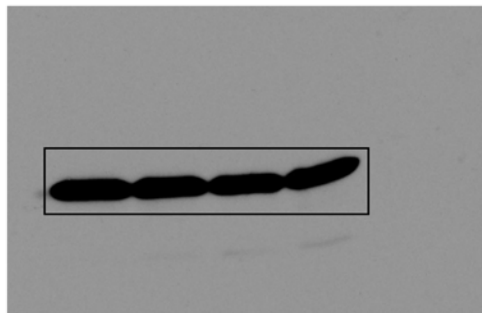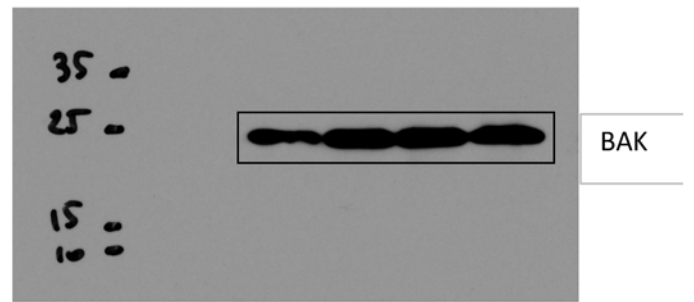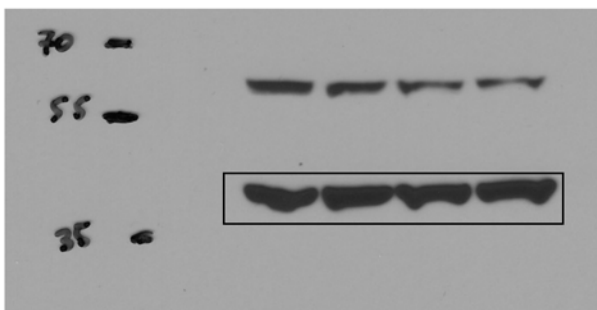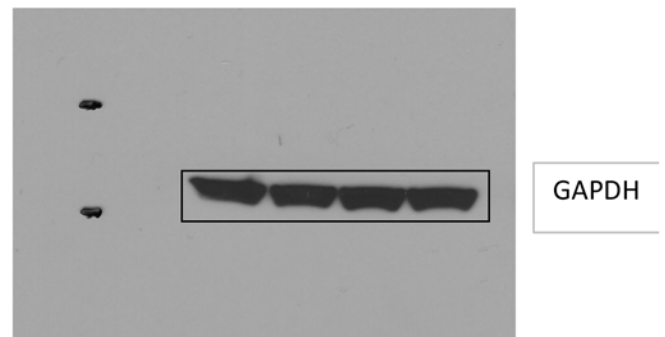

Figure 6

C

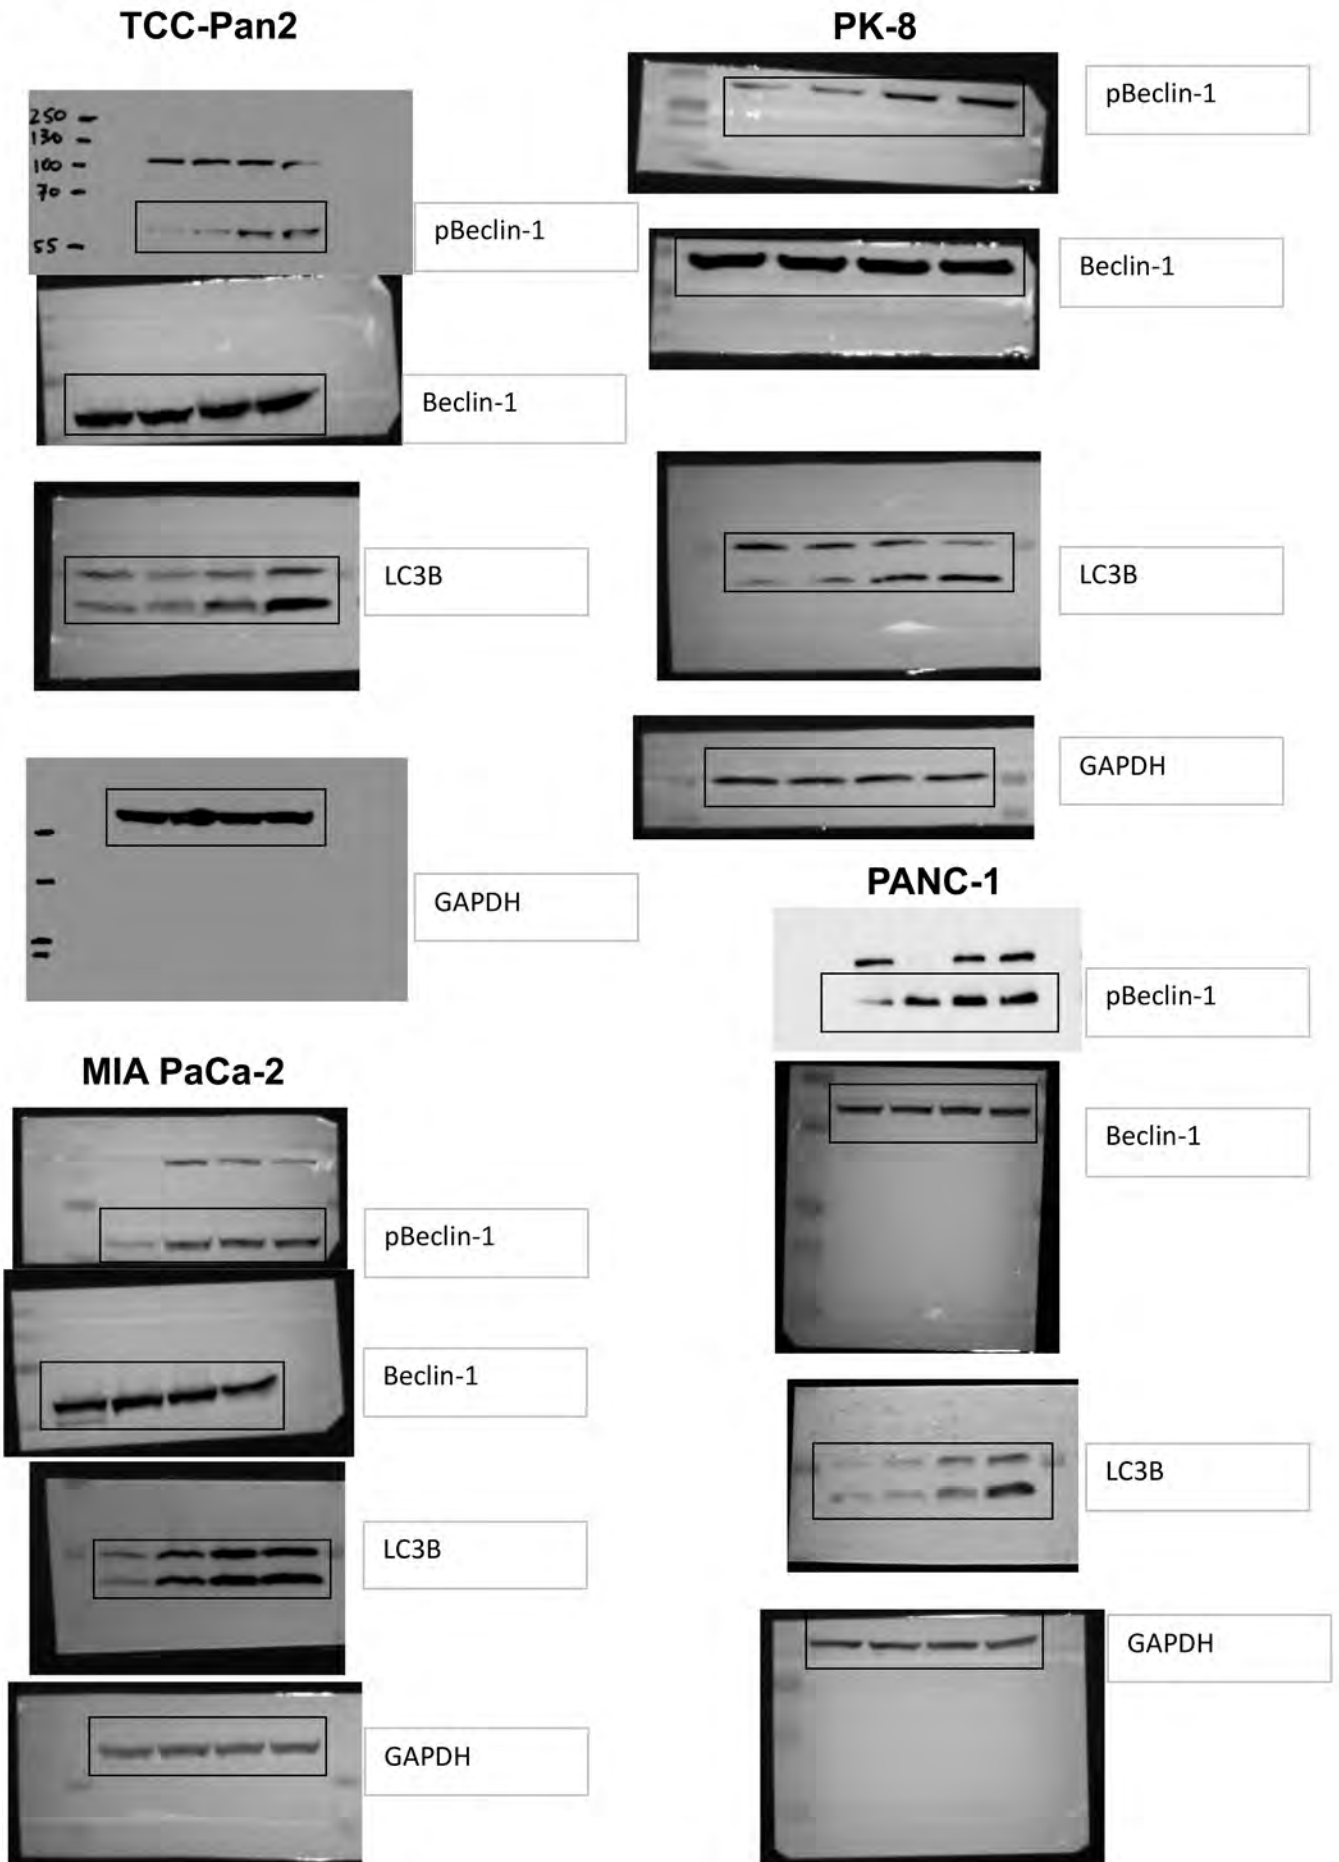



**Figure 6**

**E**

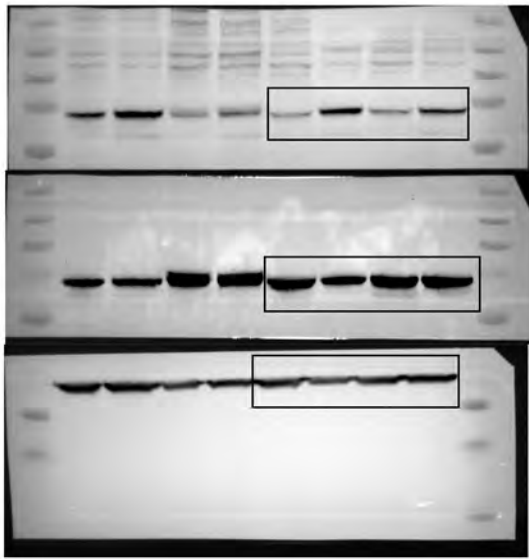

**G**

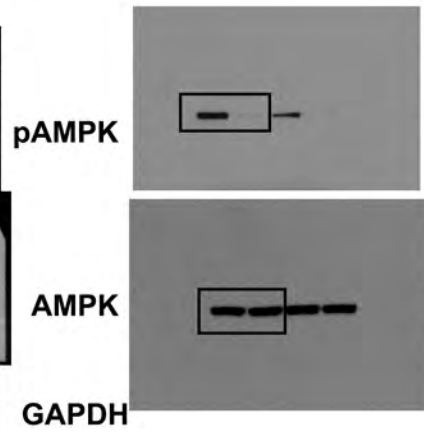

**H**

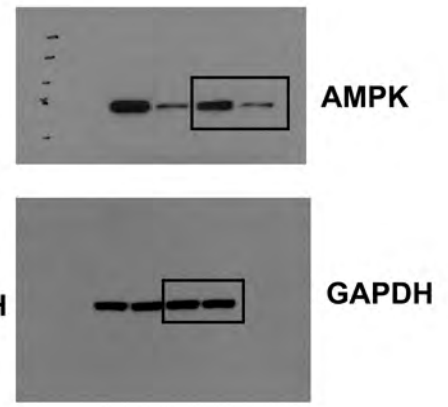

**I**

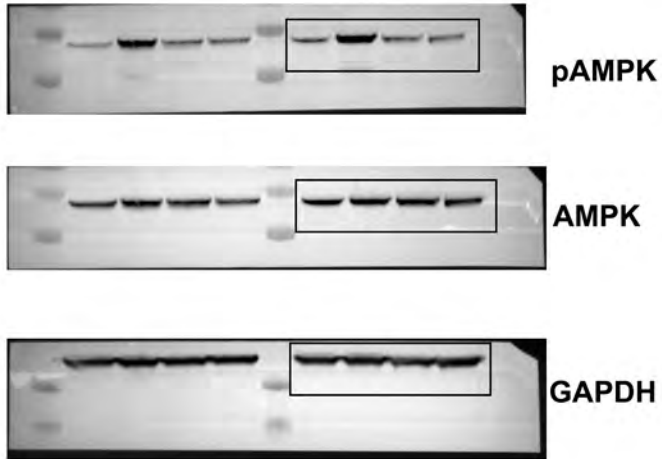

**J**

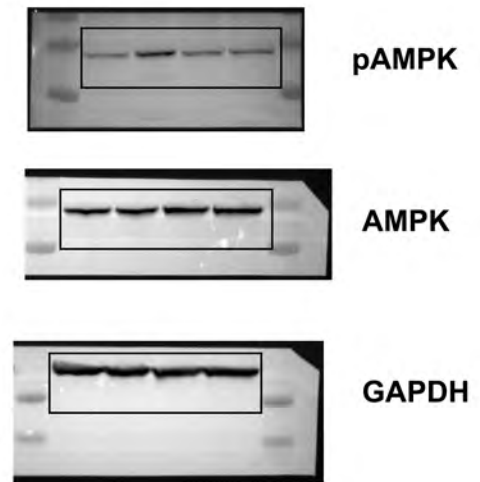

Figure 7

B

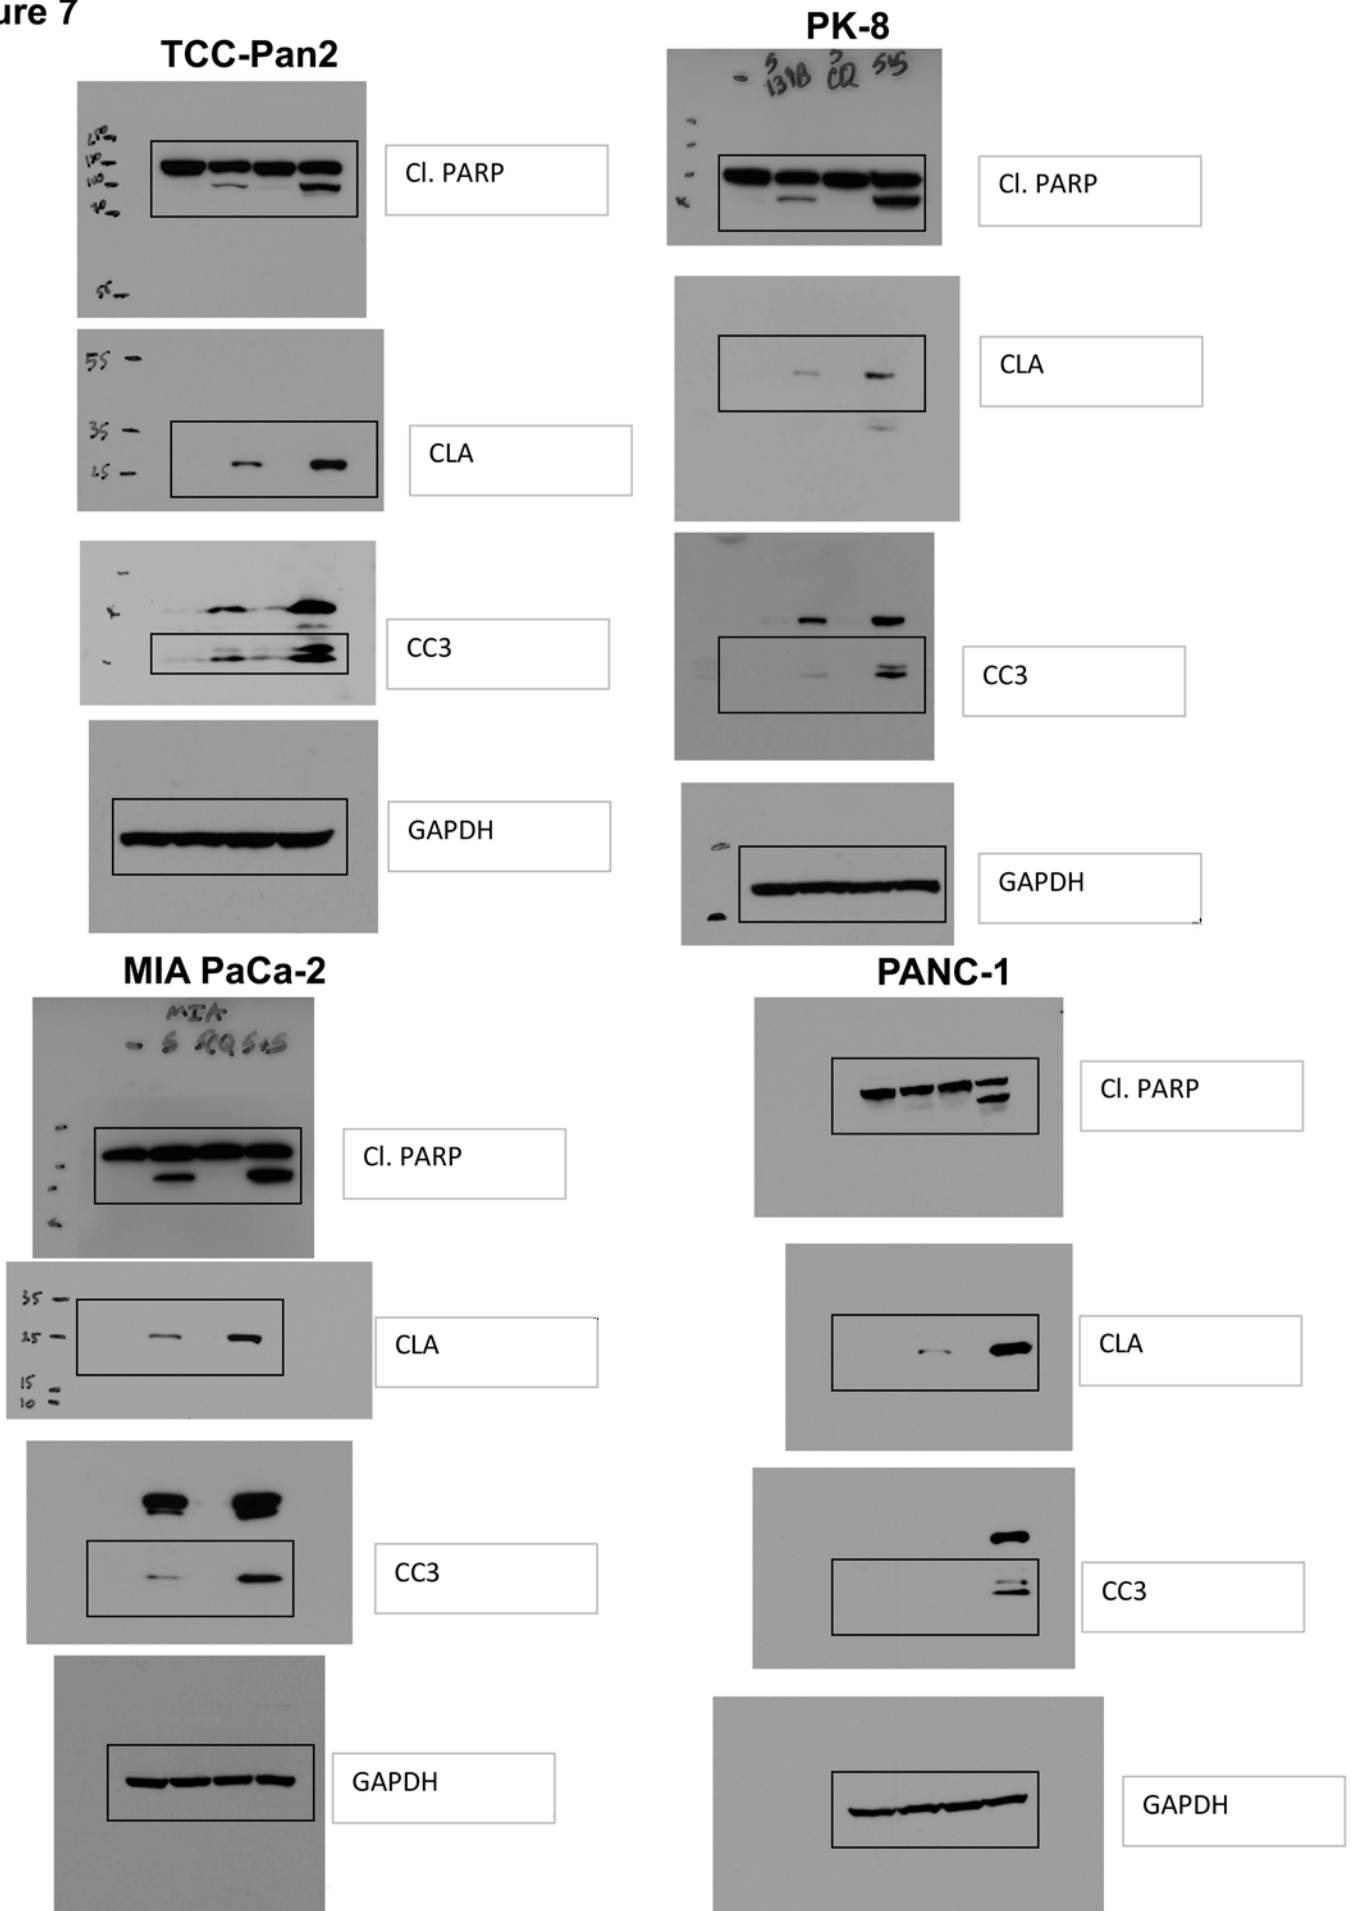

# Supplemental Figure 1

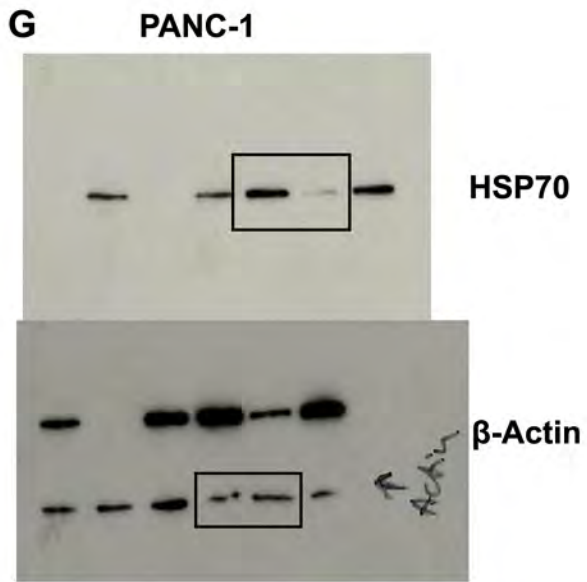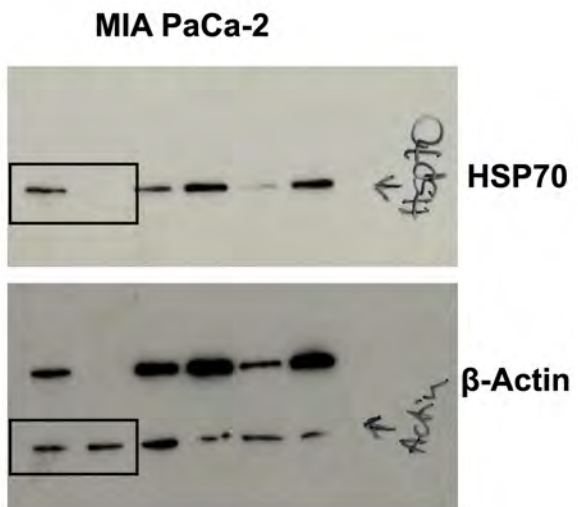

# Supplemental Figure 3

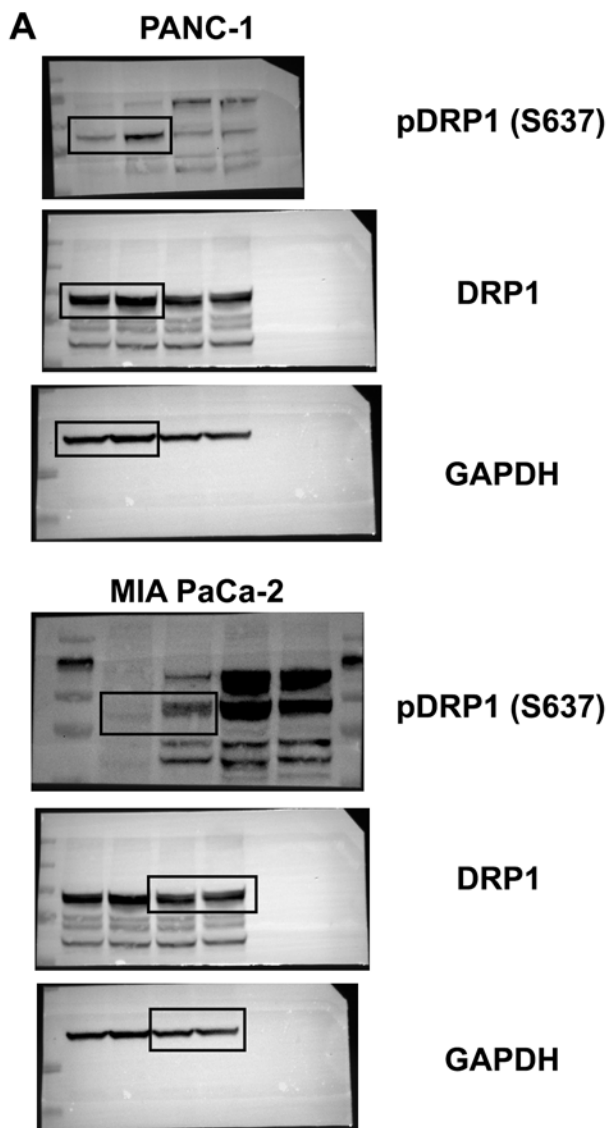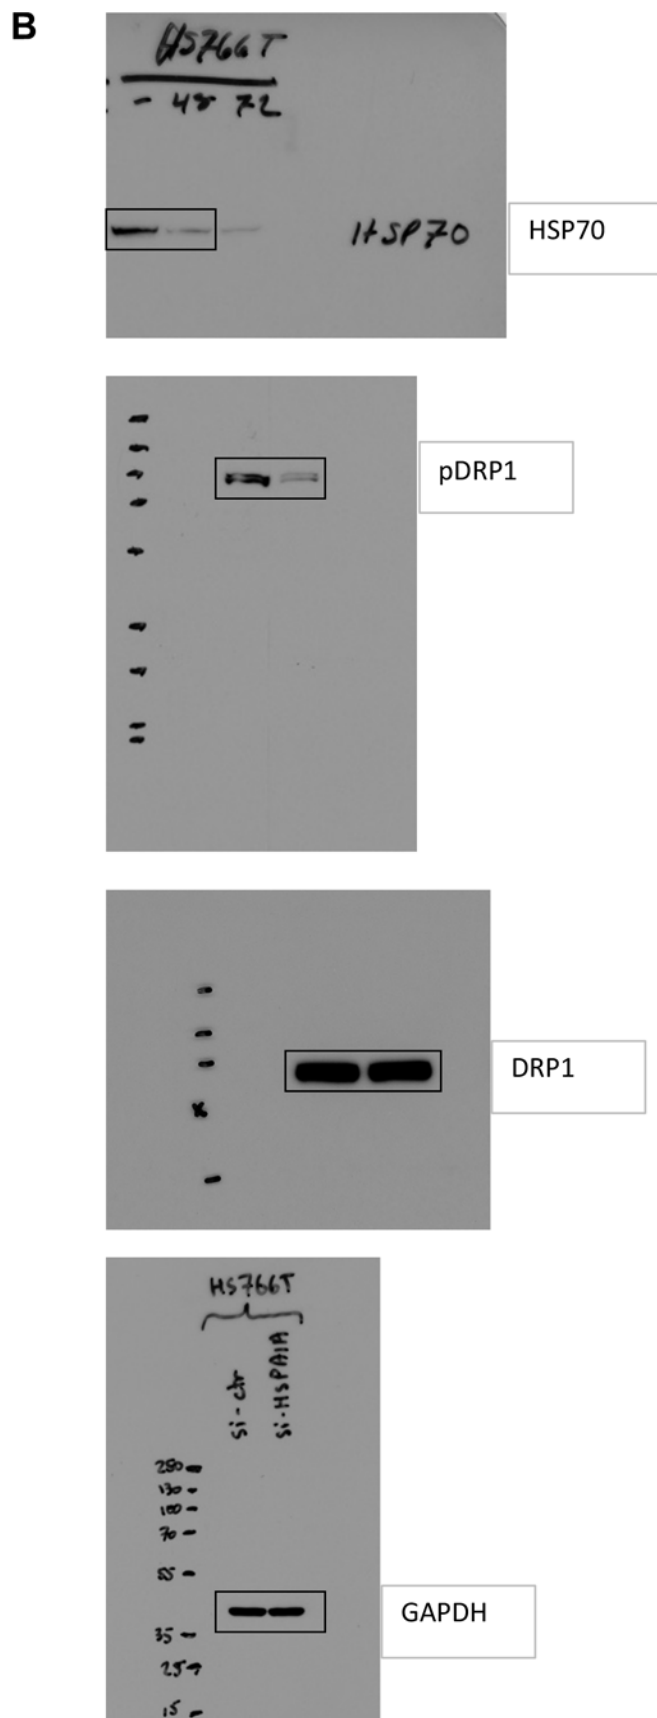

# Supplemental Figure 3

**E**

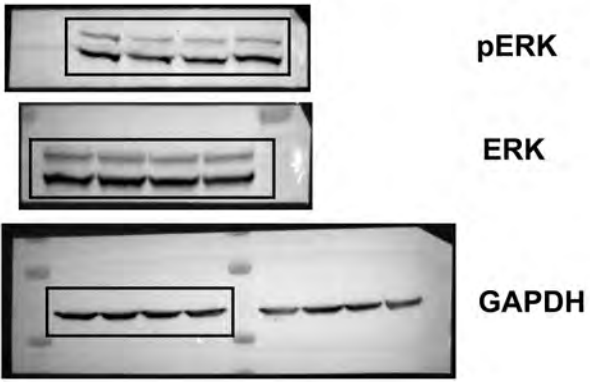

**F**

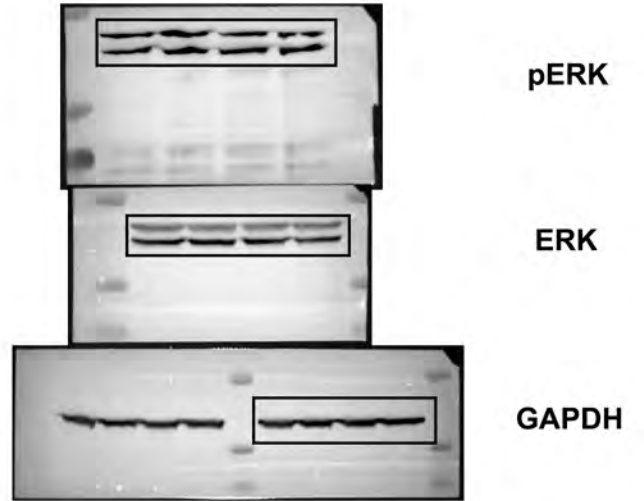

**G**

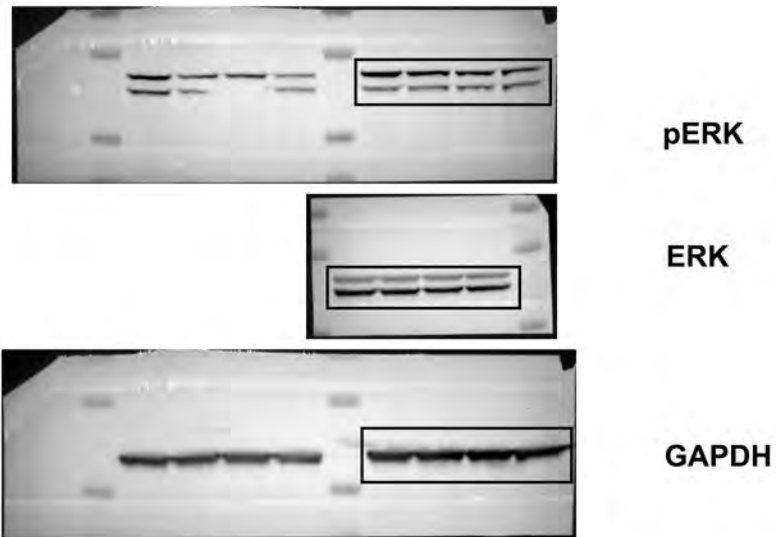

# Supplemental Figure 3

H

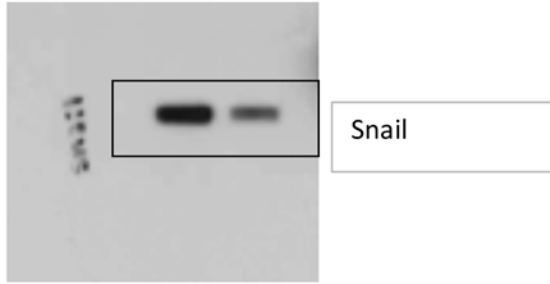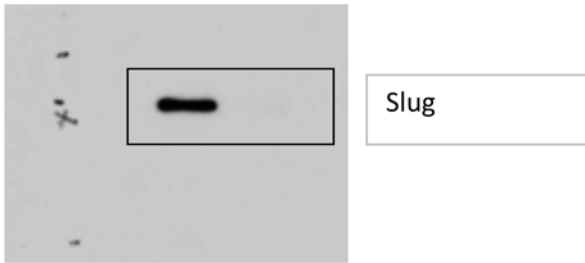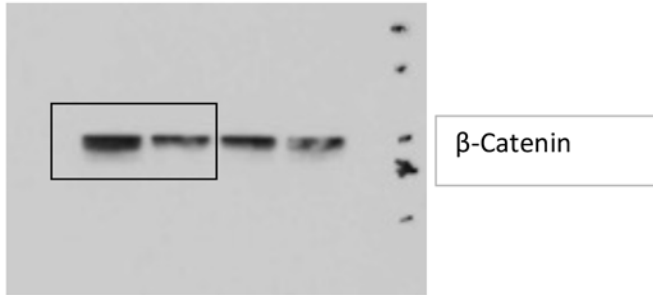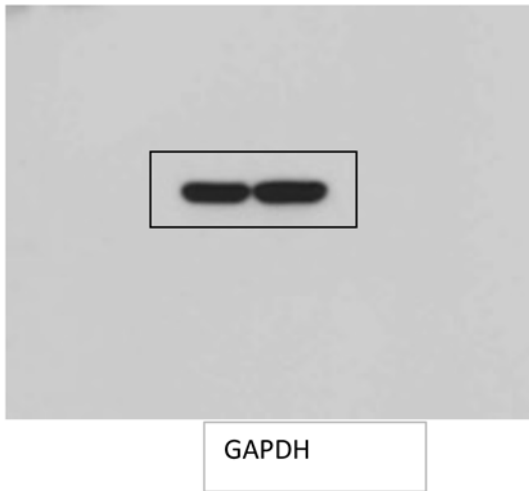

I

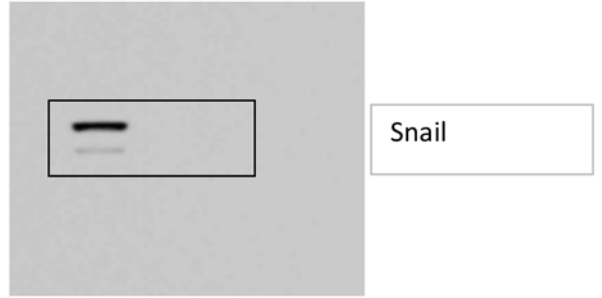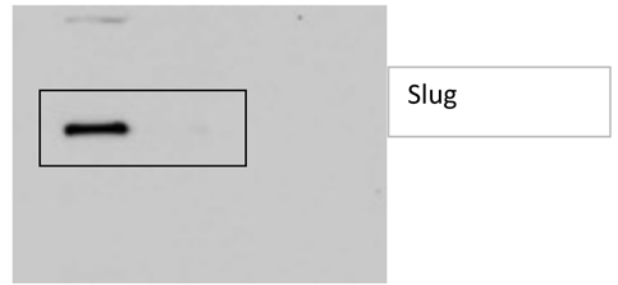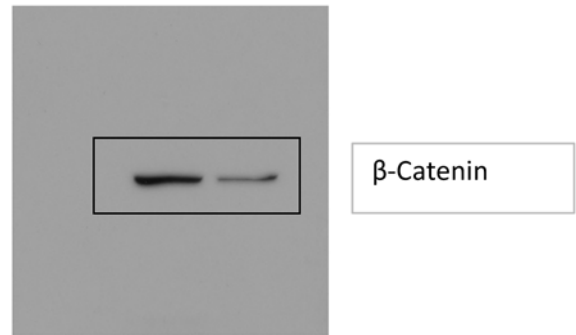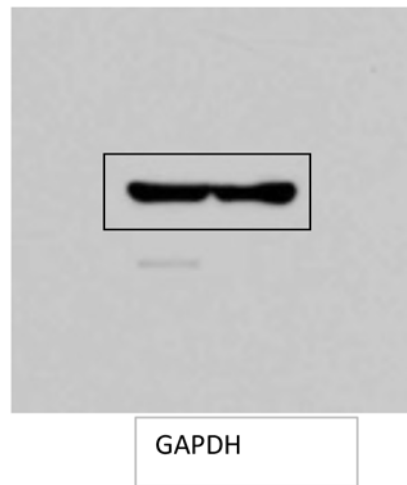

Supplemental Figure 4

E PANC-1

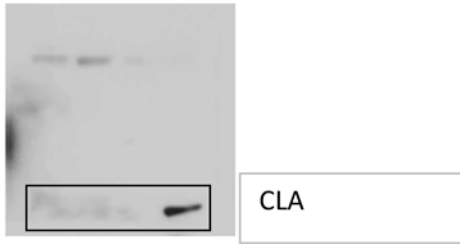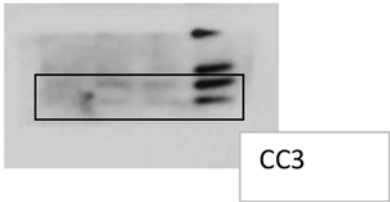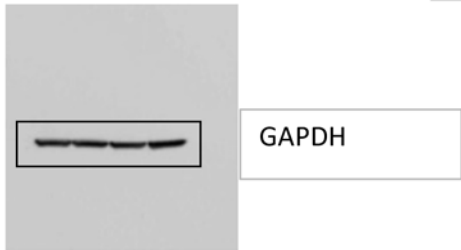

AsPC-1

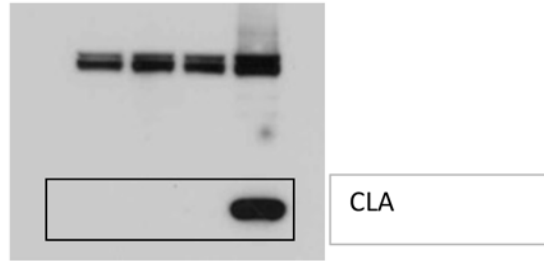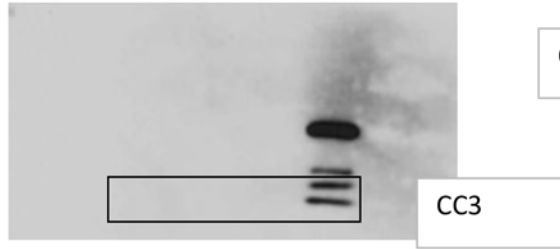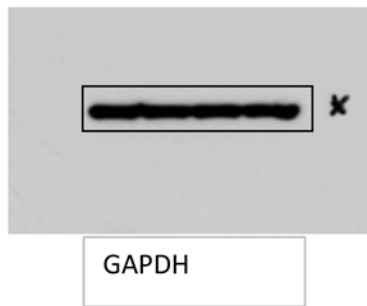

Hs766T

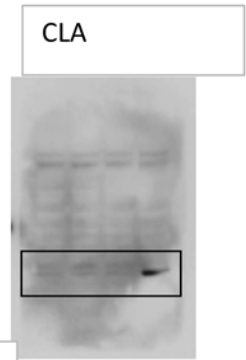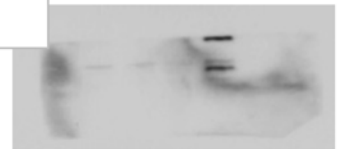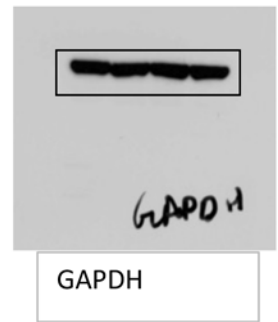

PSN-1

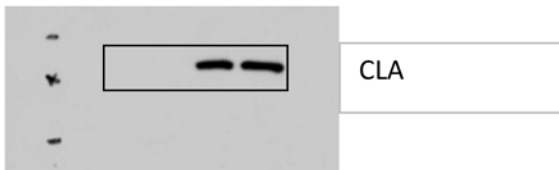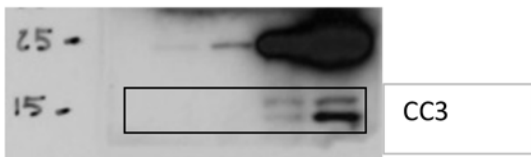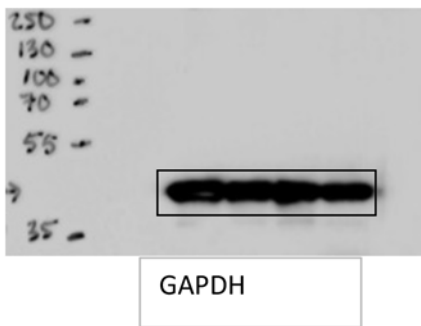

BxPC-3

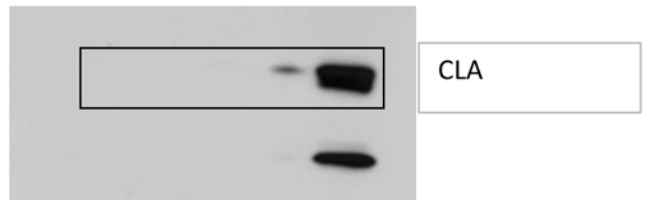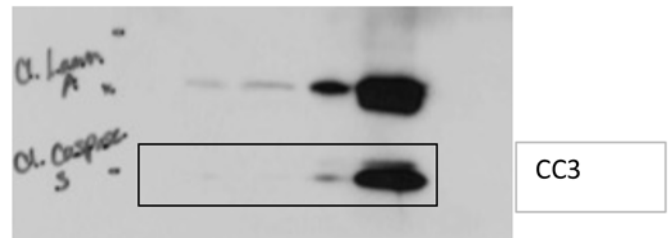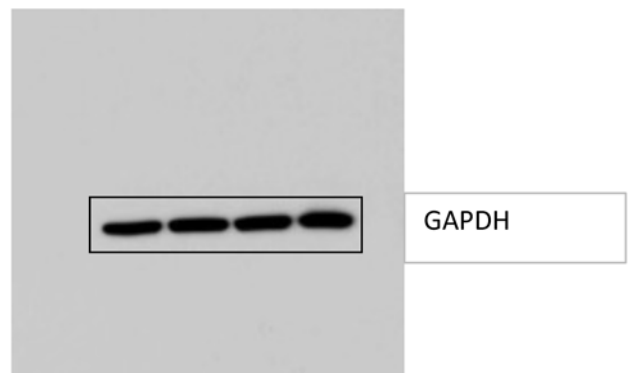

# Supplemental Figure 4

F

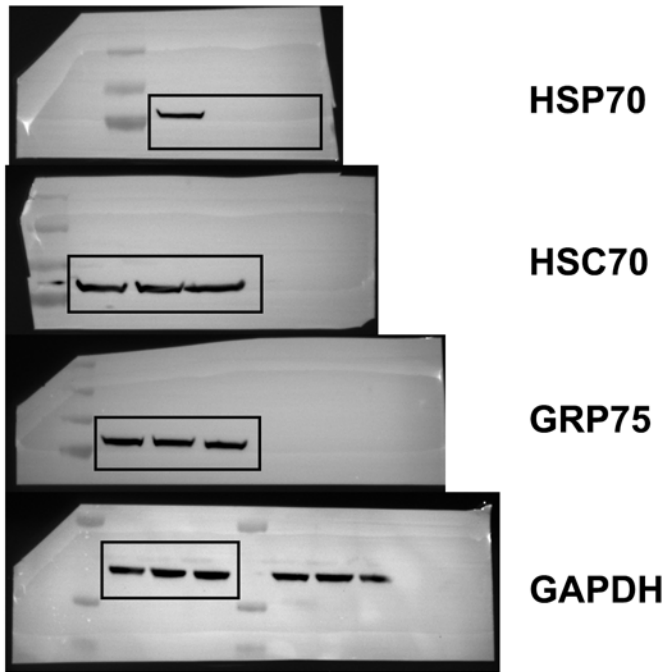

G

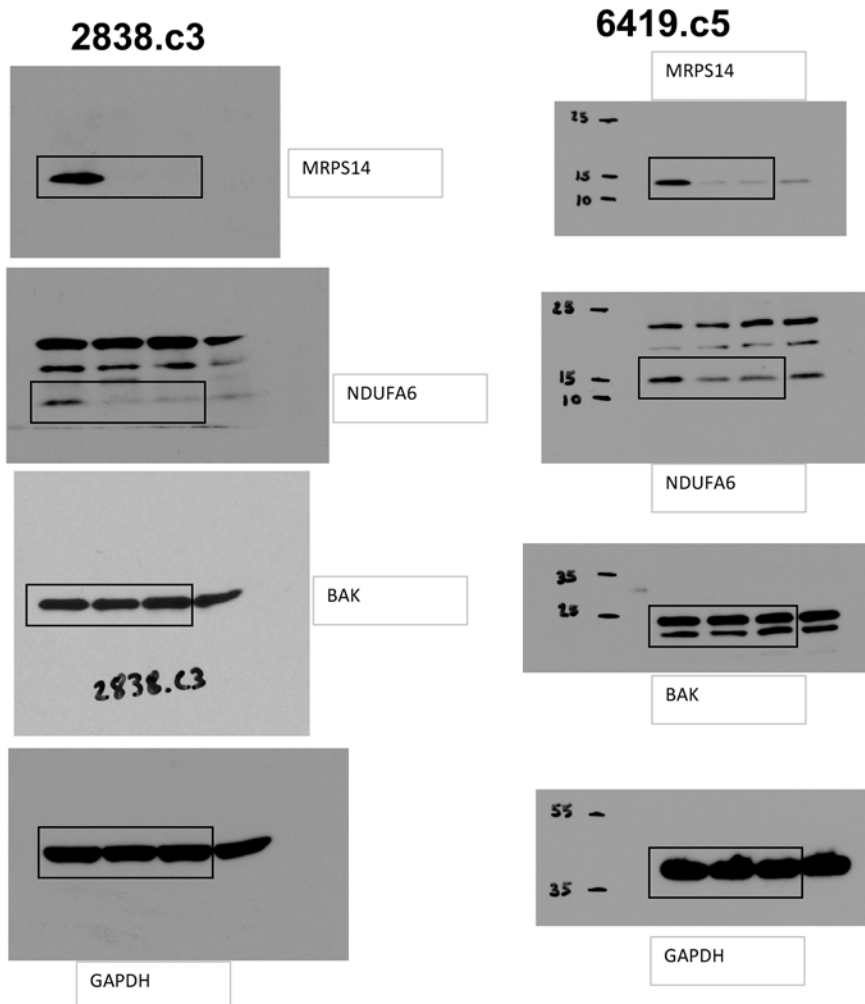

Supplement: 41418_2024_1310_MOESM2_ESM.pdf [file 41418_2024_1310_MOESM2_ESM.pdf]
